# Supplementary material for: Improving the electrochemical properties of the red P anode in Na-ion batteries via the space confinement of carbon nanopores
Source: Royal Society of Chemistry journal article supplement (doi:10.1039/c5ta08367b), 2015-01-01
Supplement: c5ta08367b1.pdf [file c5ta08367b1.pdf]

Electronic Supplementary Information for

**Improving the electrochemical properties of red P anode in Na-ion batteries via the space confinement of carbon nanopores**

**Na Wu,<sup>a,b,c</sup> Hu-Rong Yao,<sup>a,c</sup> Ya-Xia Yin<sup>a</sup> and Yu-Guo Guo<sup>\*a,c</sup>**

<sup>a</sup> Key Laboratory of Molecular Nanostructure and Nanotechnology, and Beijing National Laboratory for Molecular Sciences, Institute of Chemistry, Chinese Academy of Sciences (CAS), Beijing 100190 (P. R. China)

<sup>b</sup> College of Chemistry and Material Science, Hebei Normal University, Shijiazhuang 050016 (P. R. China)

<sup>c</sup> University of Chinese Academy of Sciences (UCAS), Beijing 100049 (P. R. China)

\*Correspondence author. E-mail: [ygguo@iccas.ac.cn](mailto:ygguo@iccas.ac.cn)

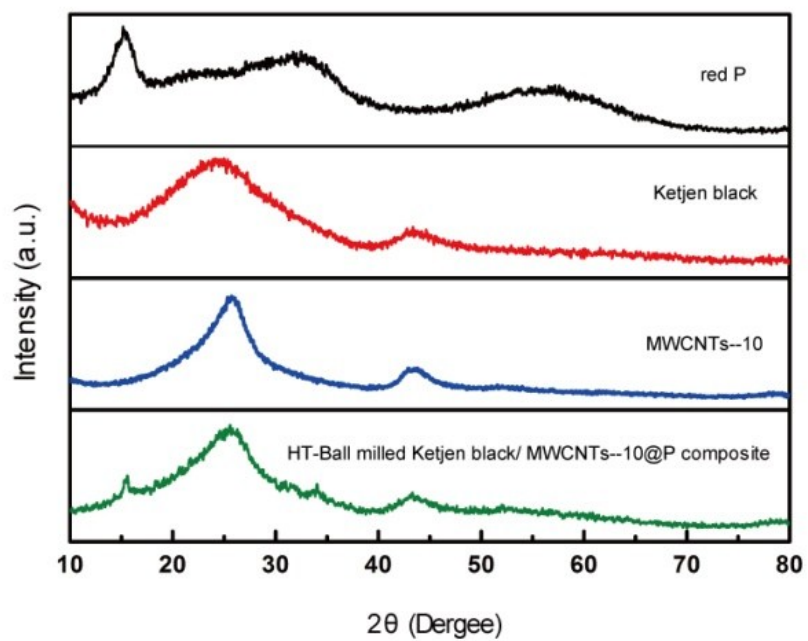

**Figure S1.** The XRD pattern of the (black) commercially available red phosphorus , (red) ketjen black and (blue) multiwalled carbon nanotube (MWCNTs) and (green) hierarchical porous carbon @red phosphorus composite.

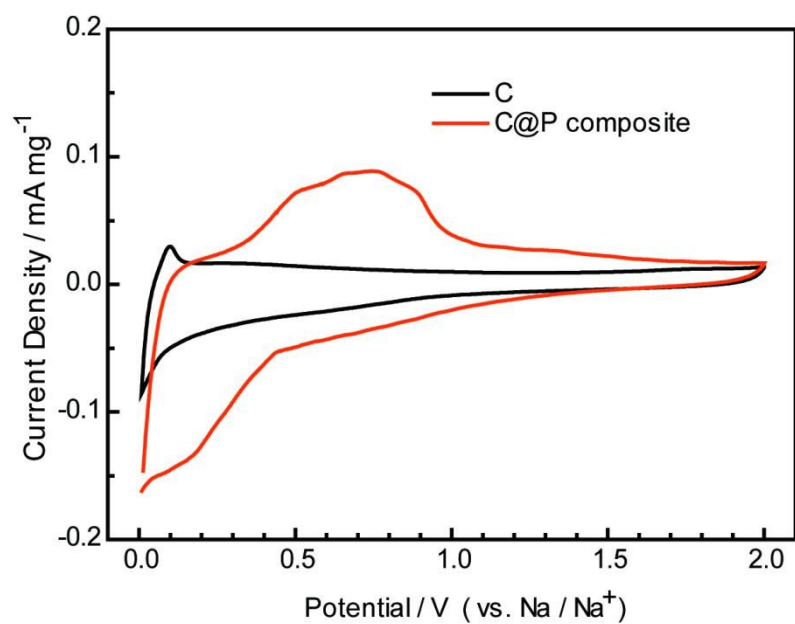

**Figure S2.** cyclic voltammograms (CVs) measured under a scan rate of  $0.1 \text{ mV s}^{-1}$  of (red) HPC@P composite electrode and (black) HPC electrode in SIBs.

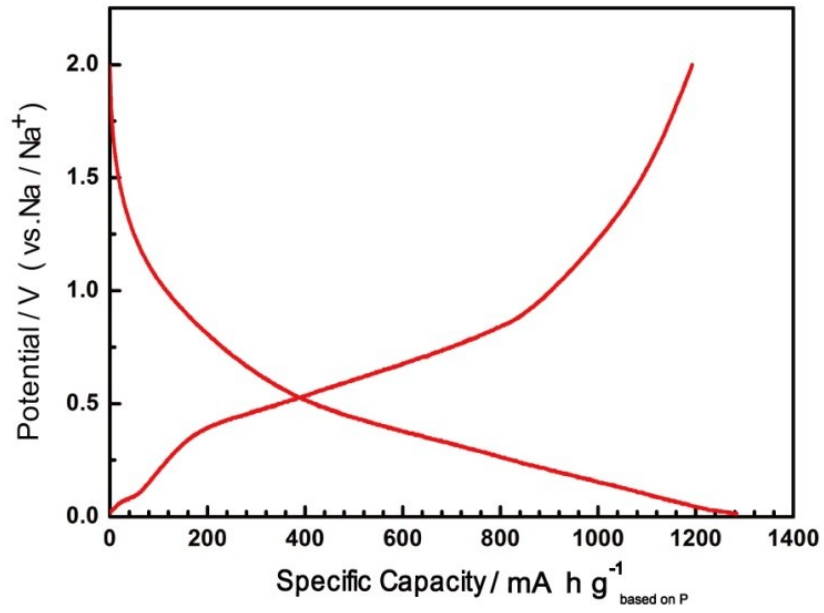

**Figure S3.** Charge-discharge characteristics (based on red P) of hierarchical porous carbon @red phosphorus composite electrode in sodium ion battery at a current density of 25 mA g<sup>-1</sup>
